# Supplementary material for: Facile synthesis of dimeric BODIPY and its catalytic activity for sulfide oxidation under visible light
Source: Royal Society of Chemistry journal article supplement (doi:10.1039/c4ra01501k), 2014-01-01

## Support Information

### Facile synthesis of dimeric Bodipy and its catalytic activity for sulfide oxidation under visible light

Liang Wang,<sup>a,b</sup> Jing Cao,<sup>a,b</sup> Jian-wei Wang,<sup>a,b</sup> Qun Chen,<sup>a,b</sup> Ai-jun Cui<sup>a,b\*</sup> and Ming-yang He<sup>a,b\*</sup>

<sup>a</sup> Jiangsu Key Laboratory of Advanced Catalytic Materials and Technology, Changzhou University, 213164, China;

<sup>b</sup> School of Petrochemical Engineering, Changzhou University, Changzhou 213164, P. R. China.

Fax: (+86)-519-86330251; E-mail: lwcczu@126.com and hemingyangjpu@yahoo.com.

#### Table of contents

|                         |        |
|-------------------------|--------|
| Spectroscopic data..... | S2-S13 |
|-------------------------|--------|

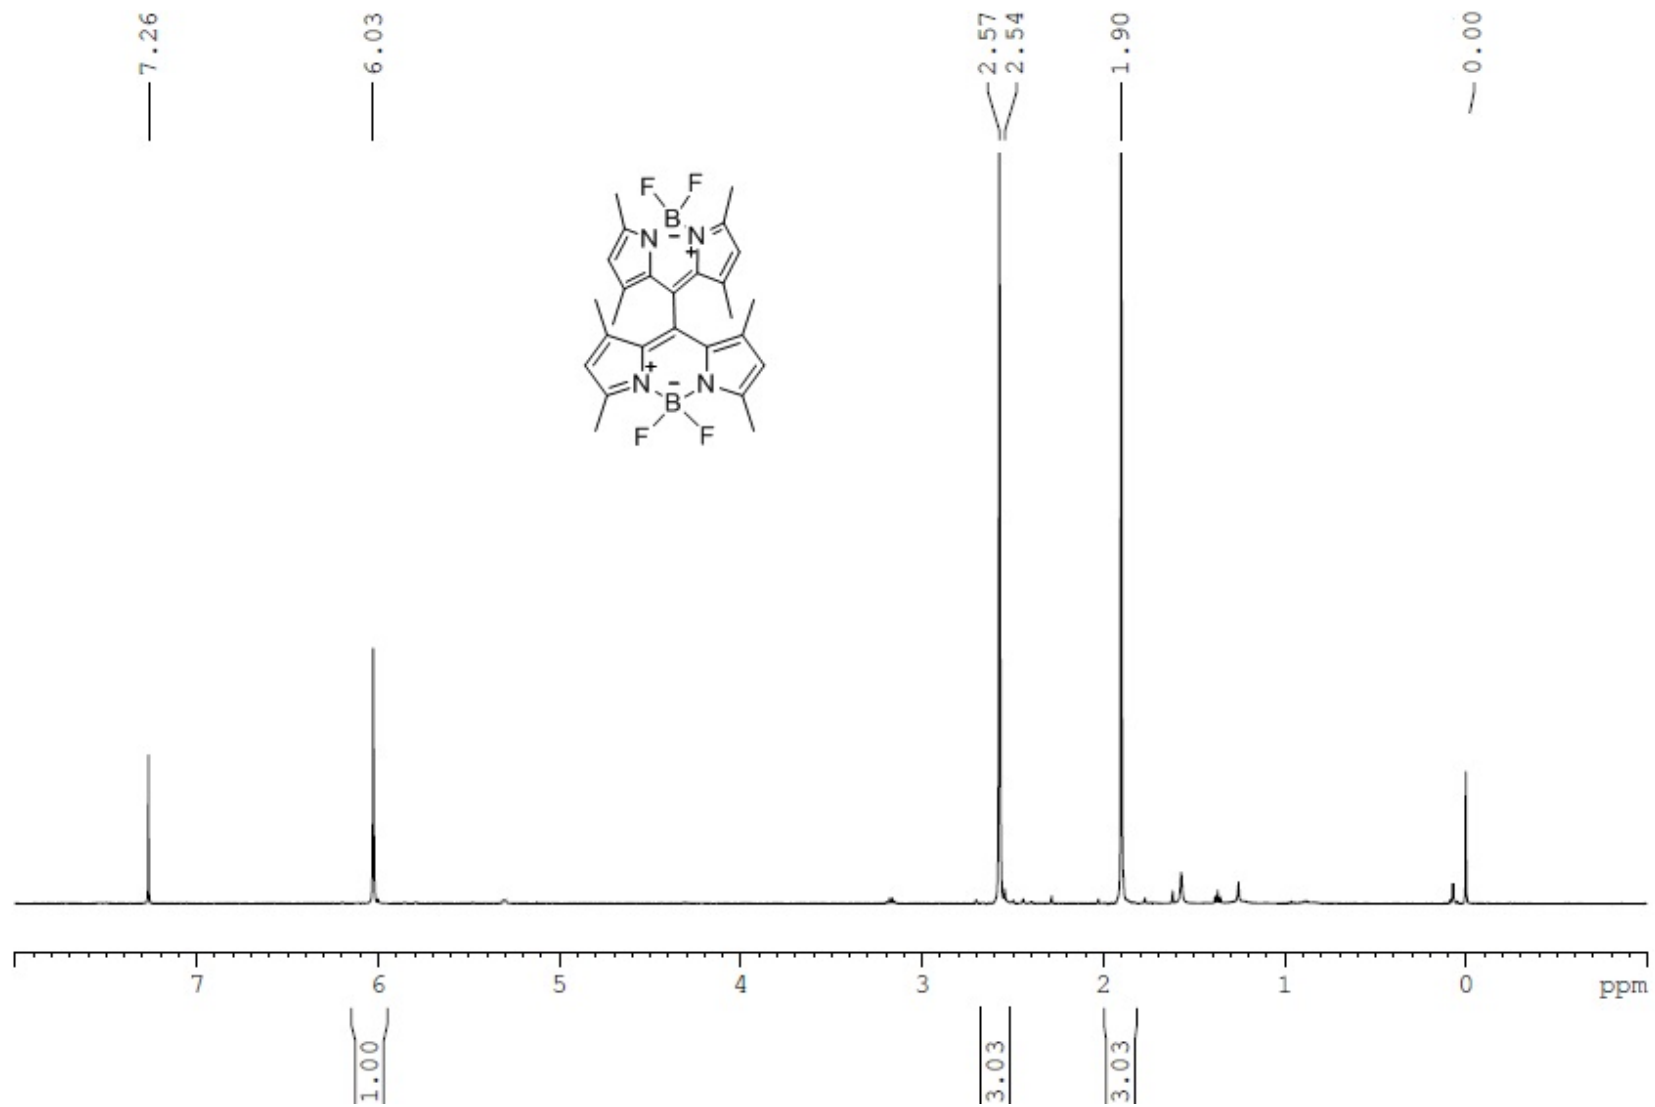

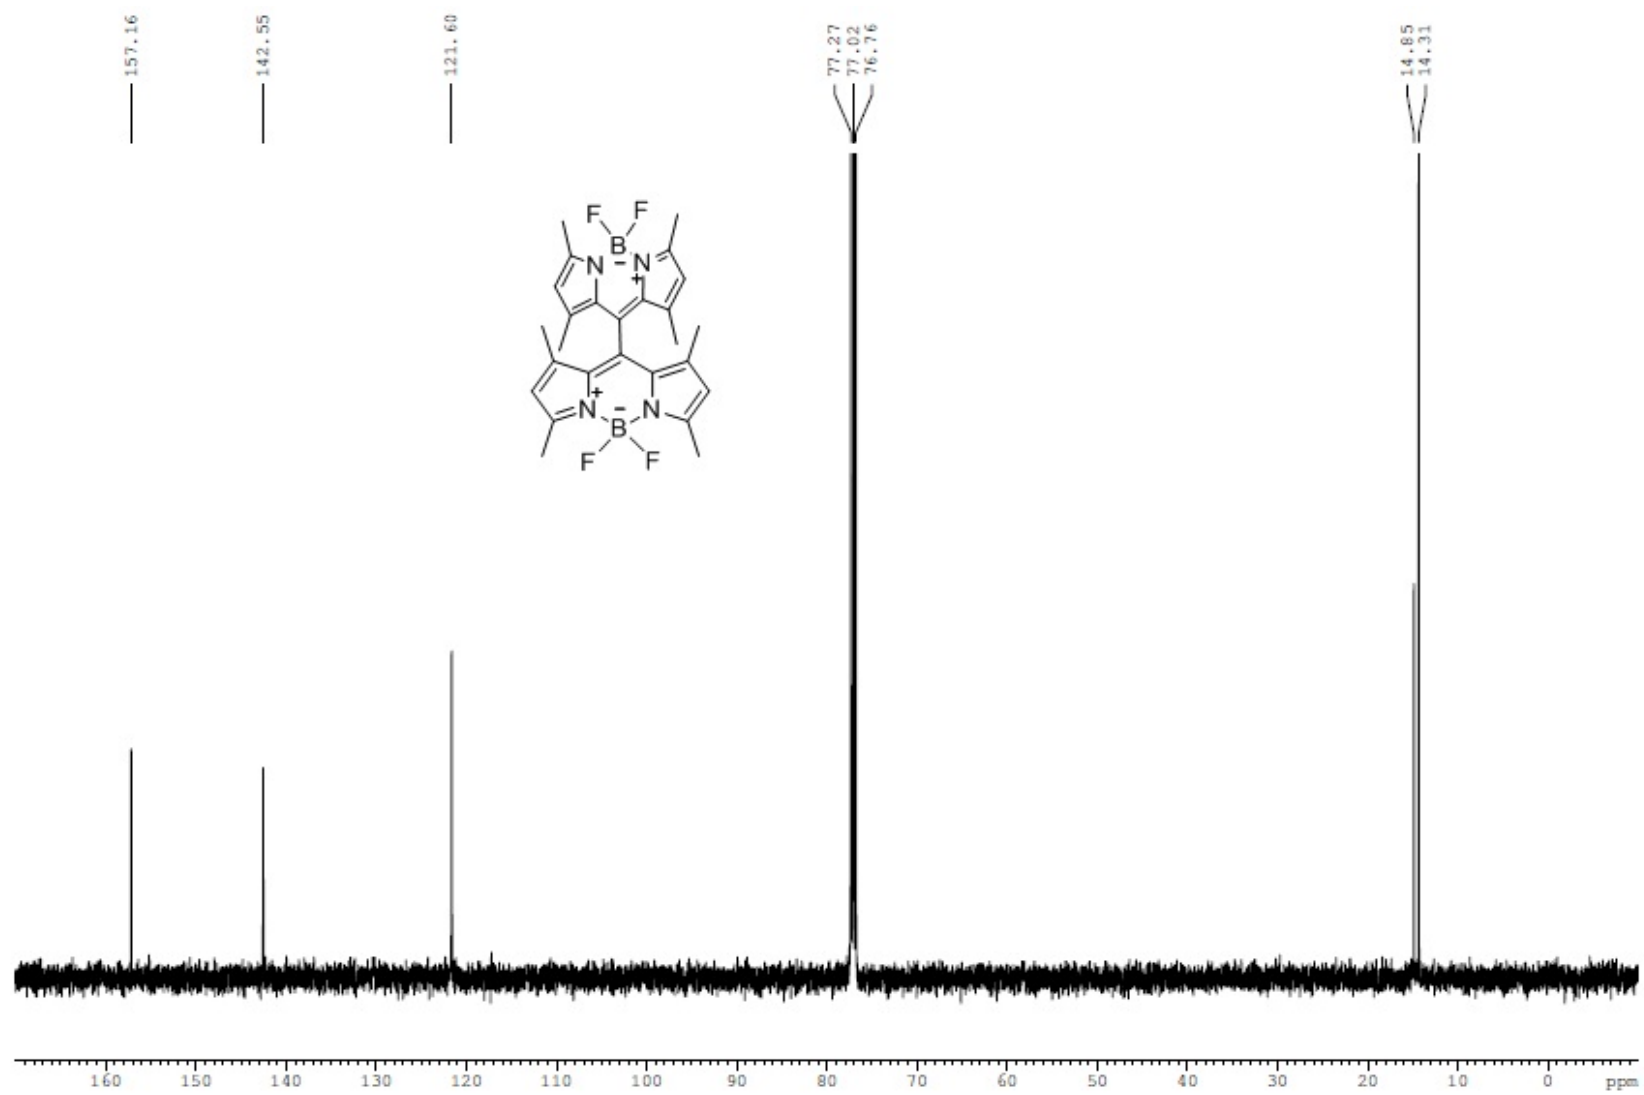

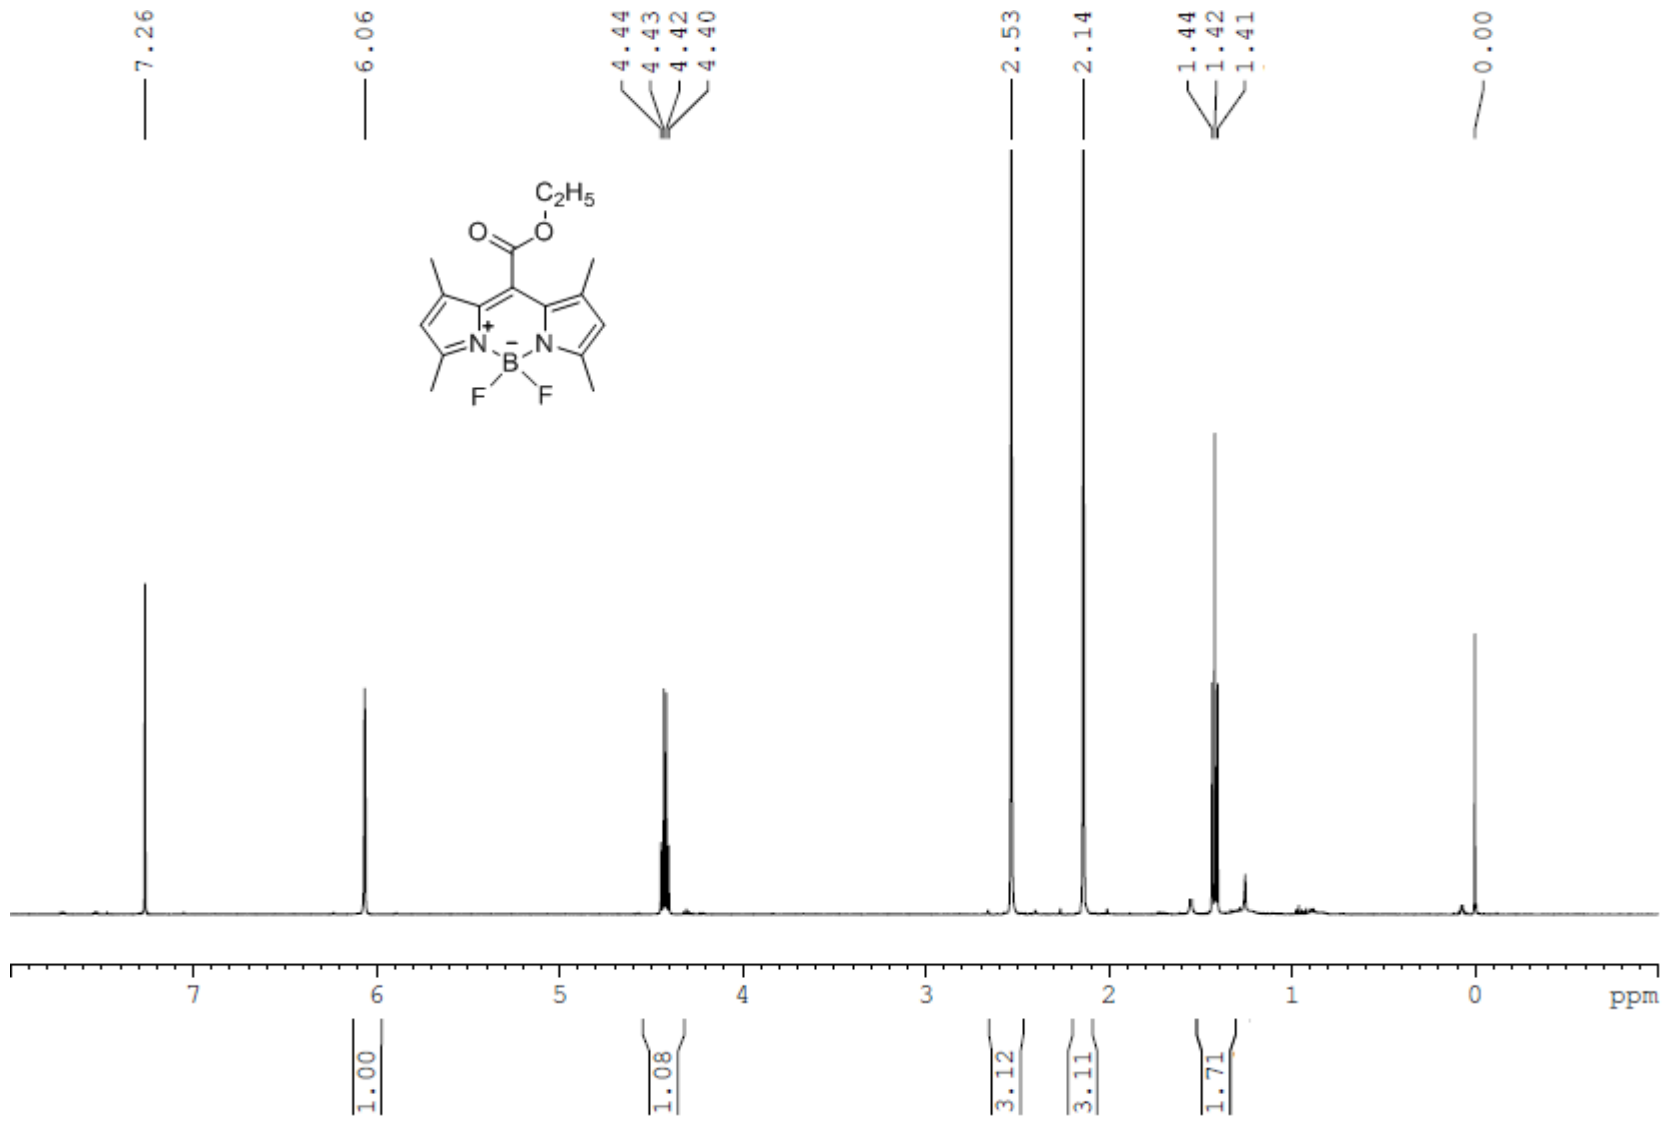

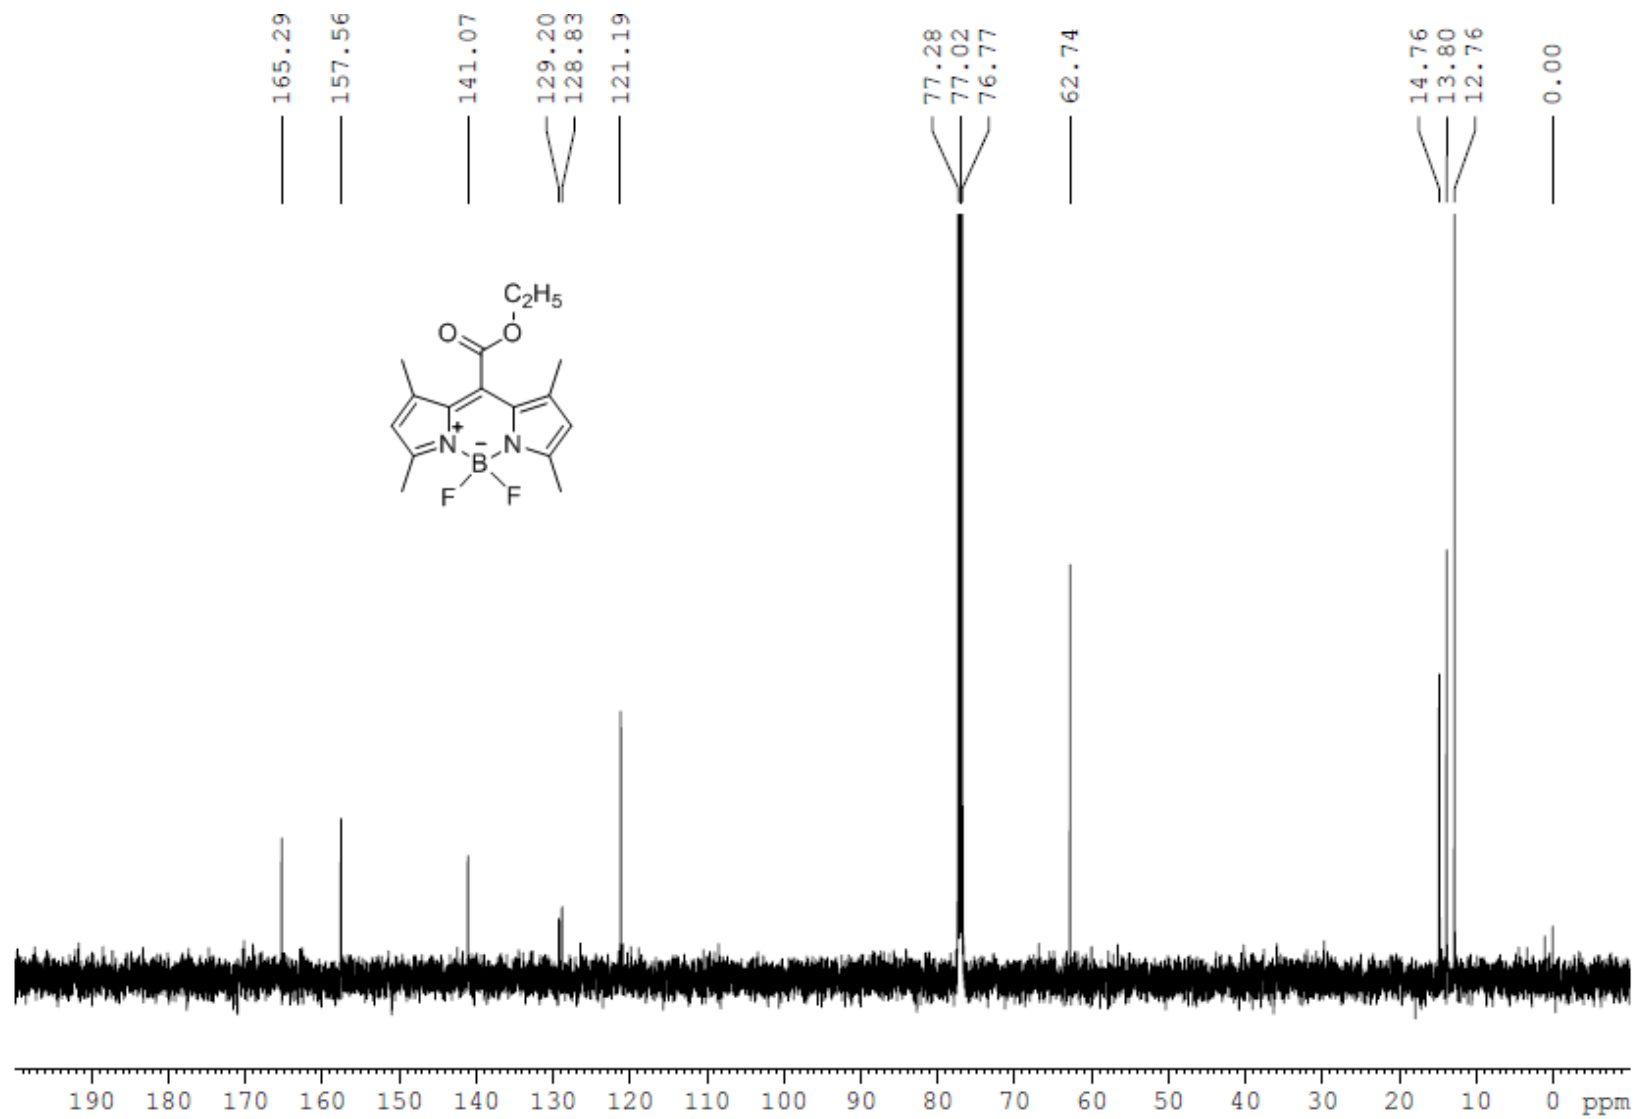

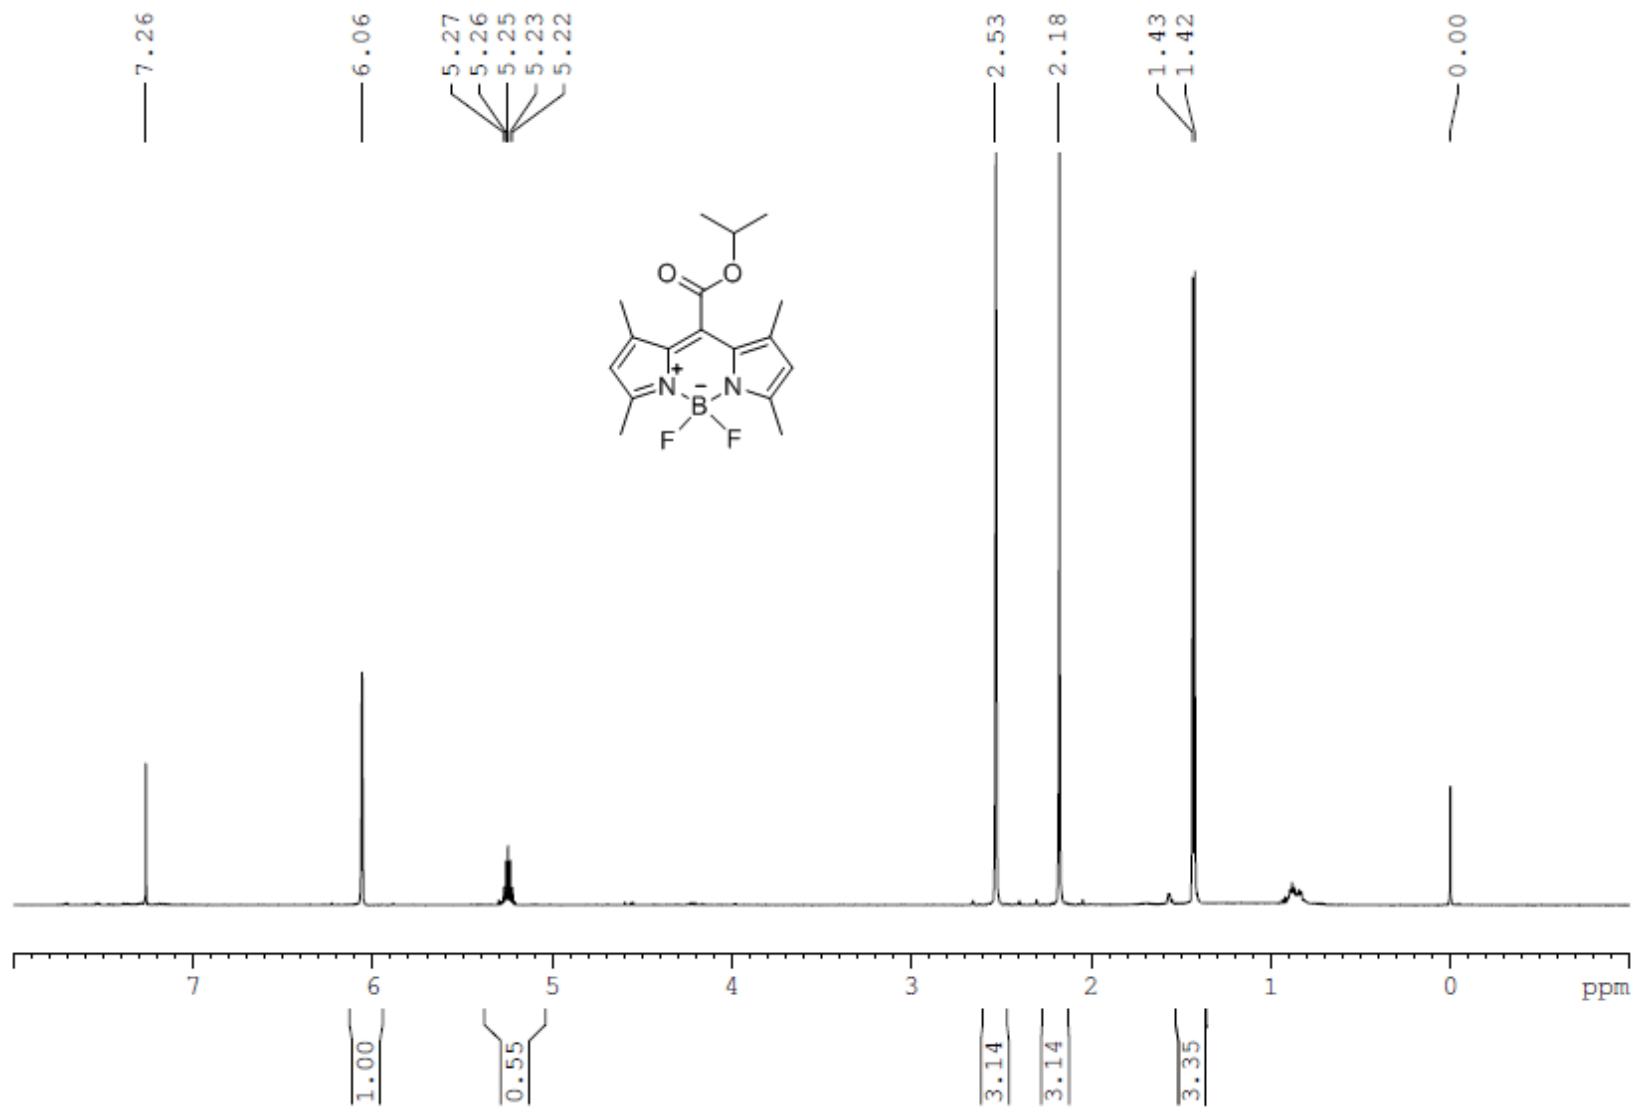

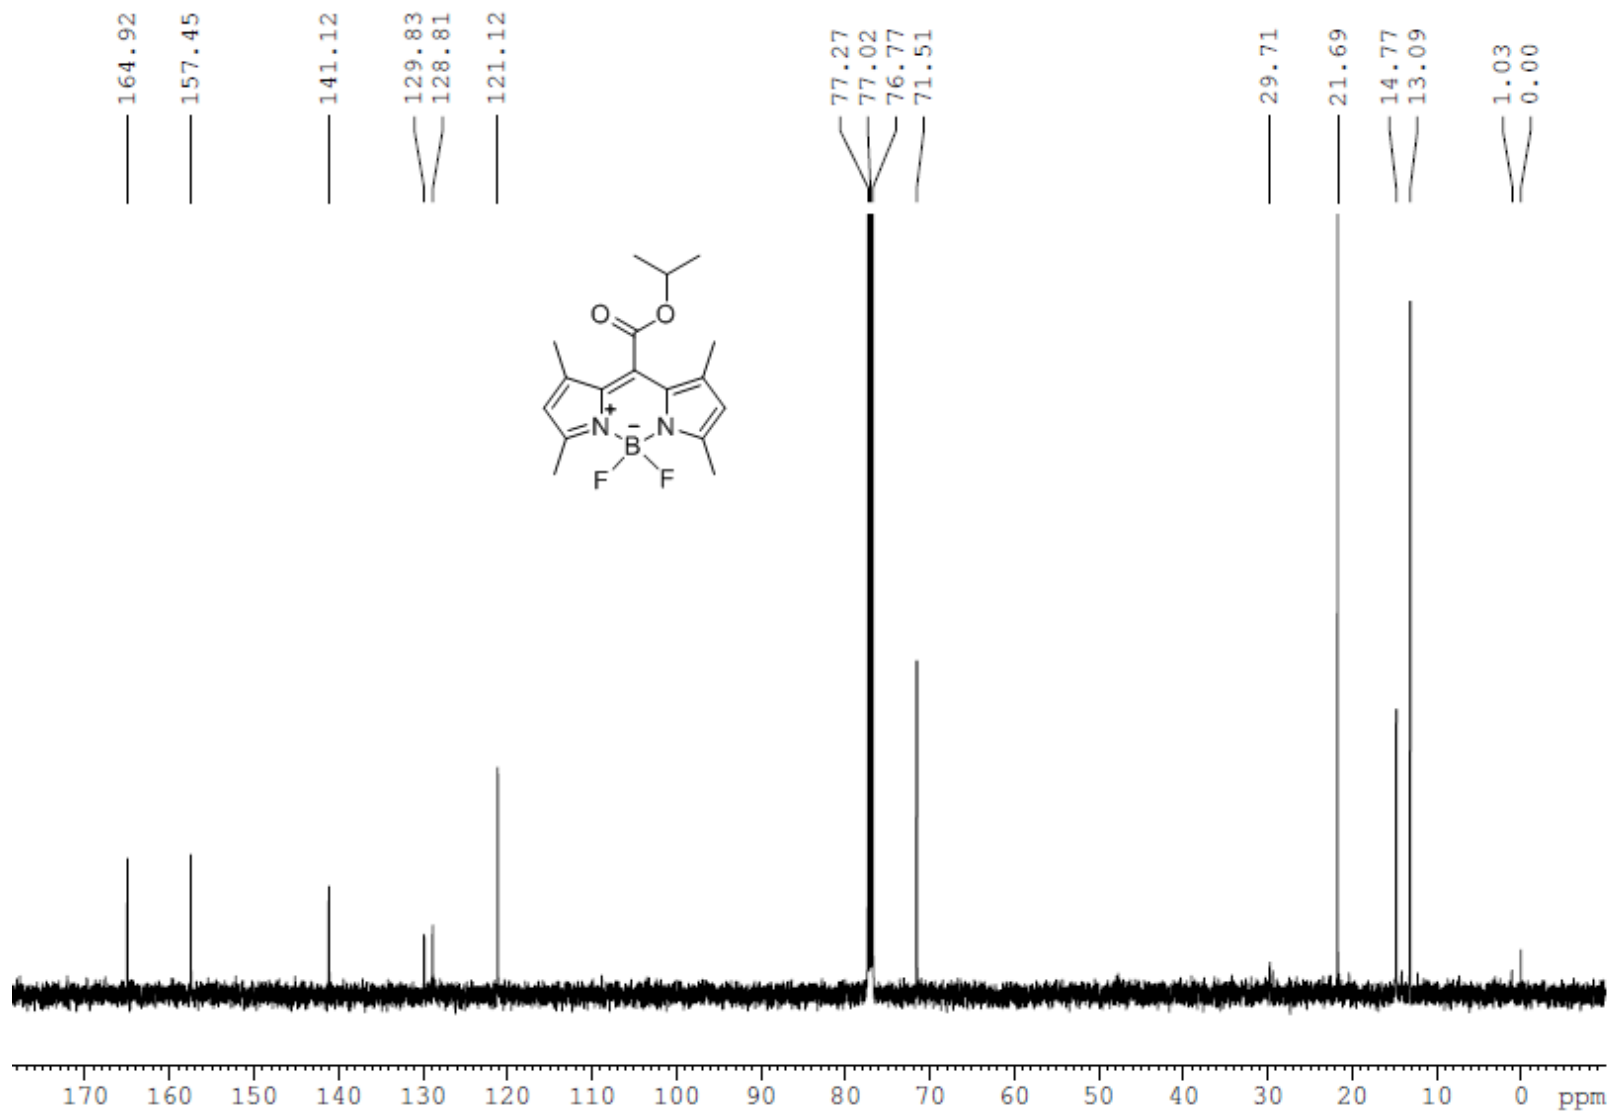

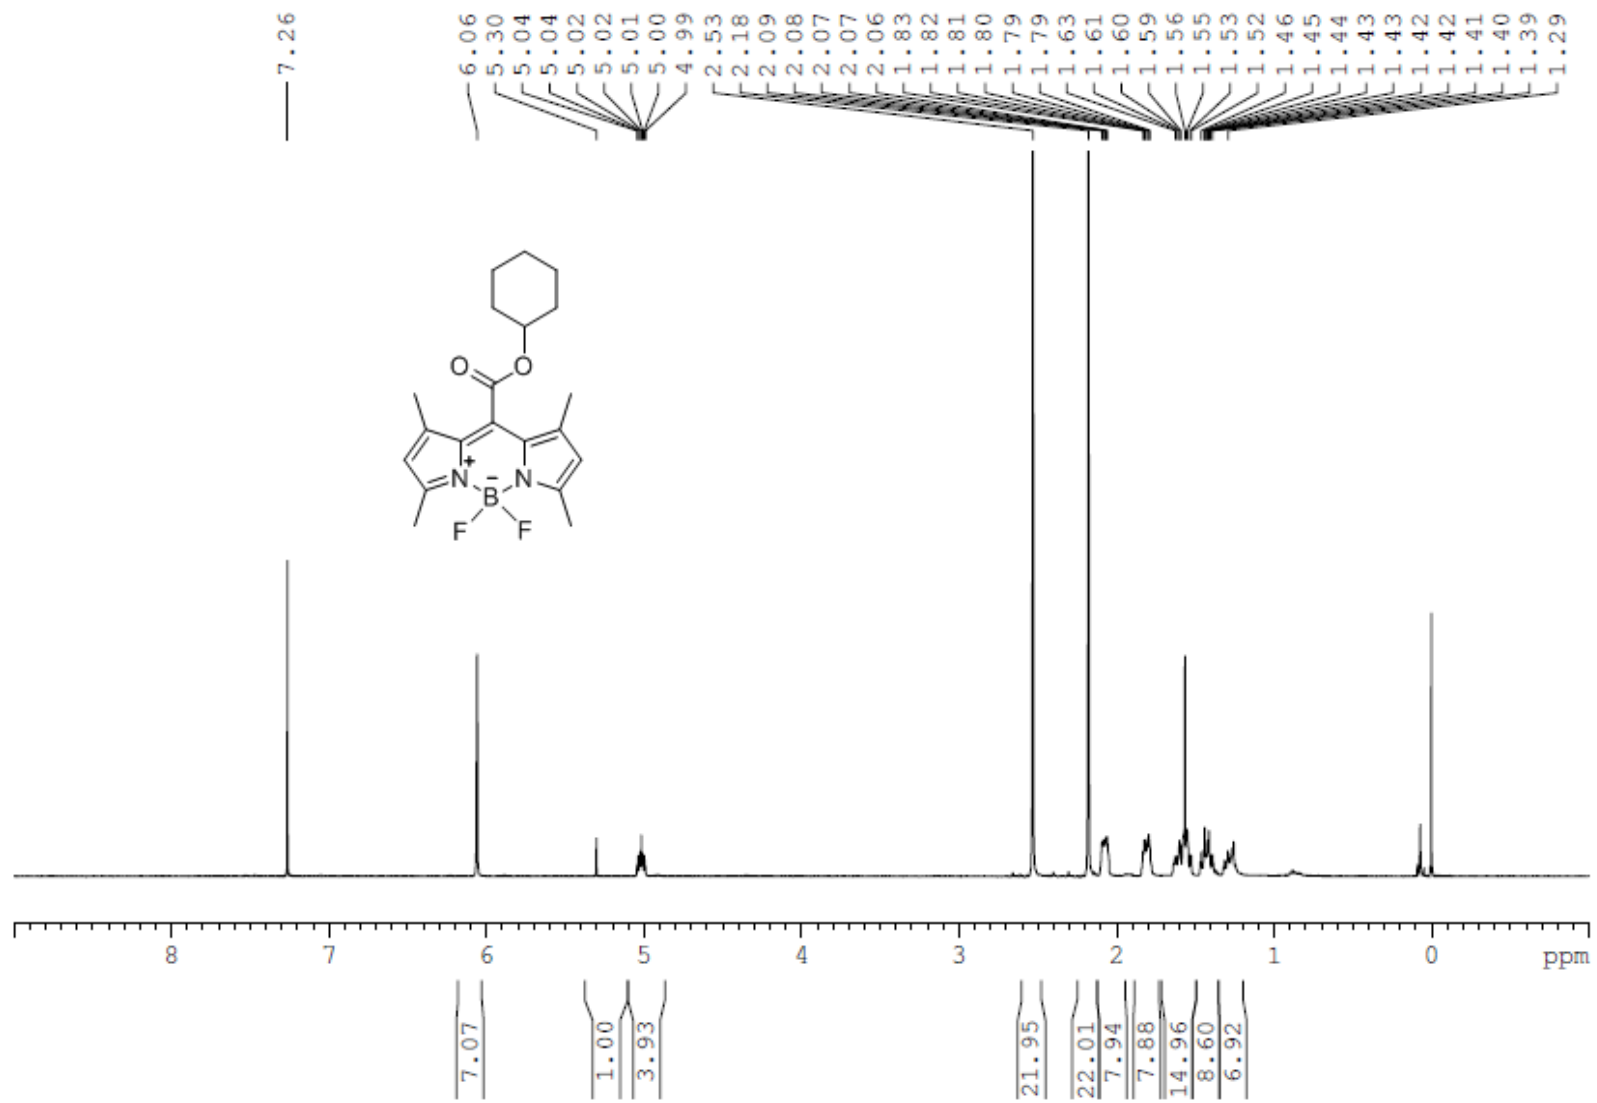



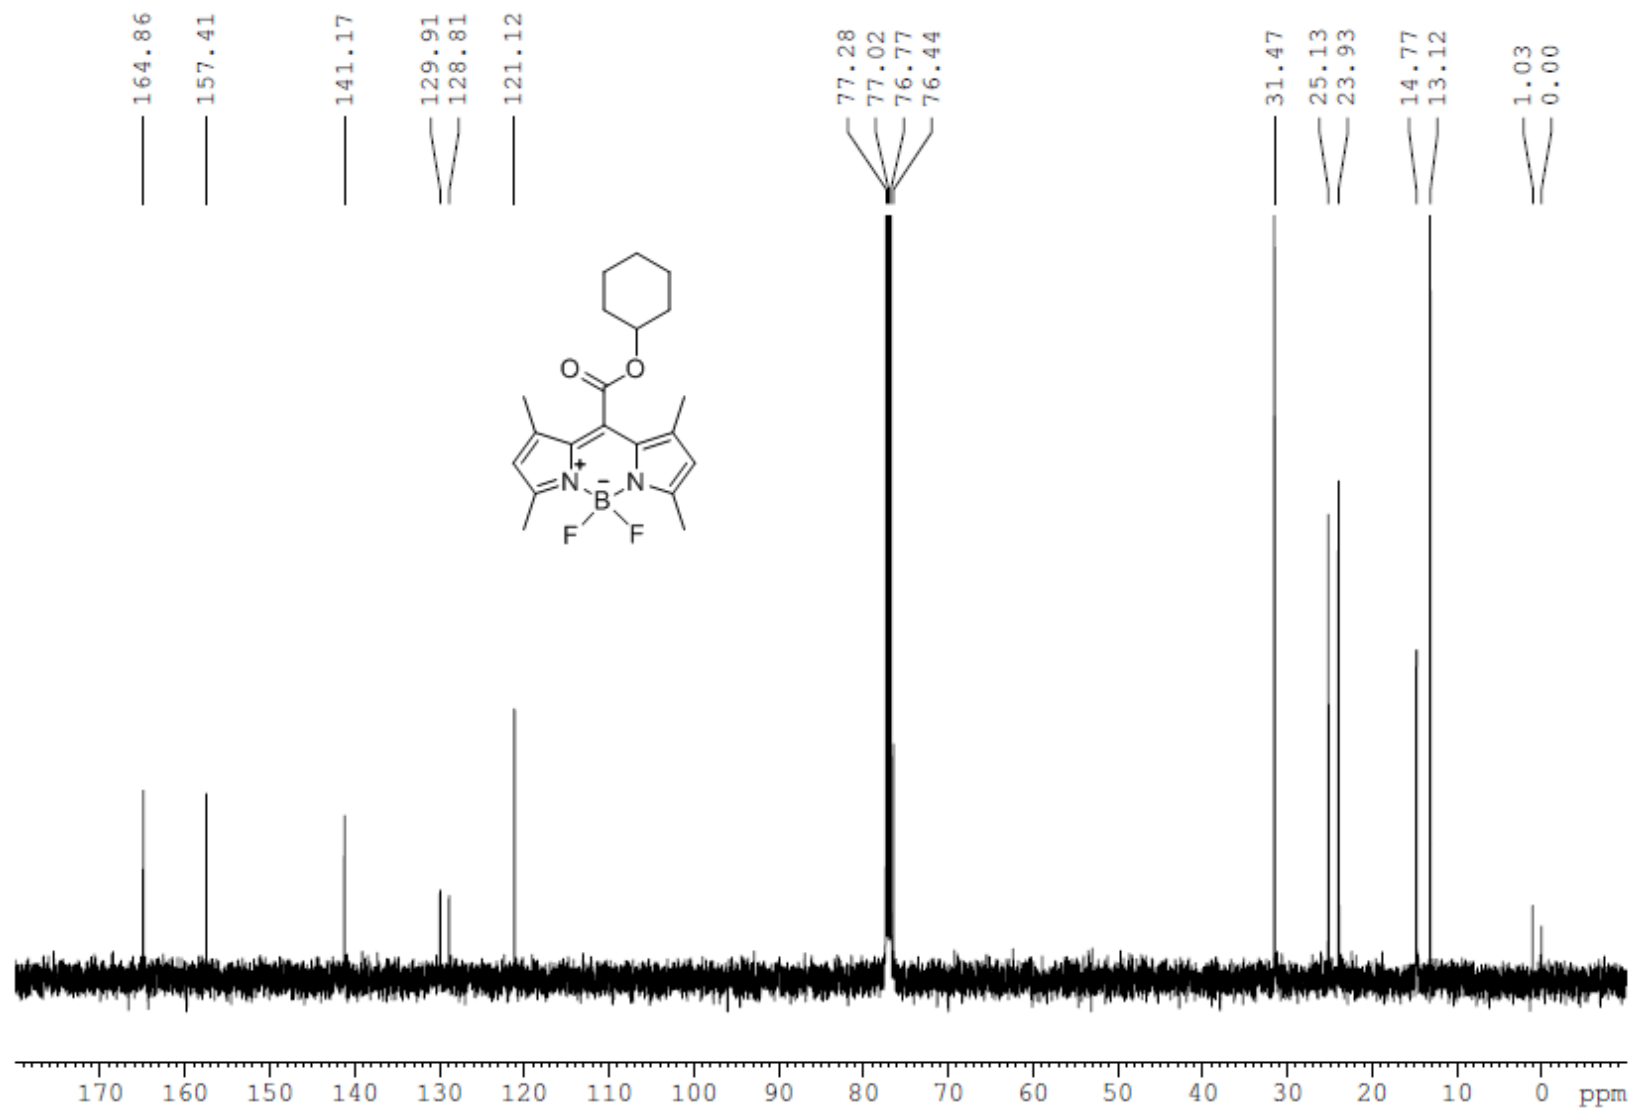

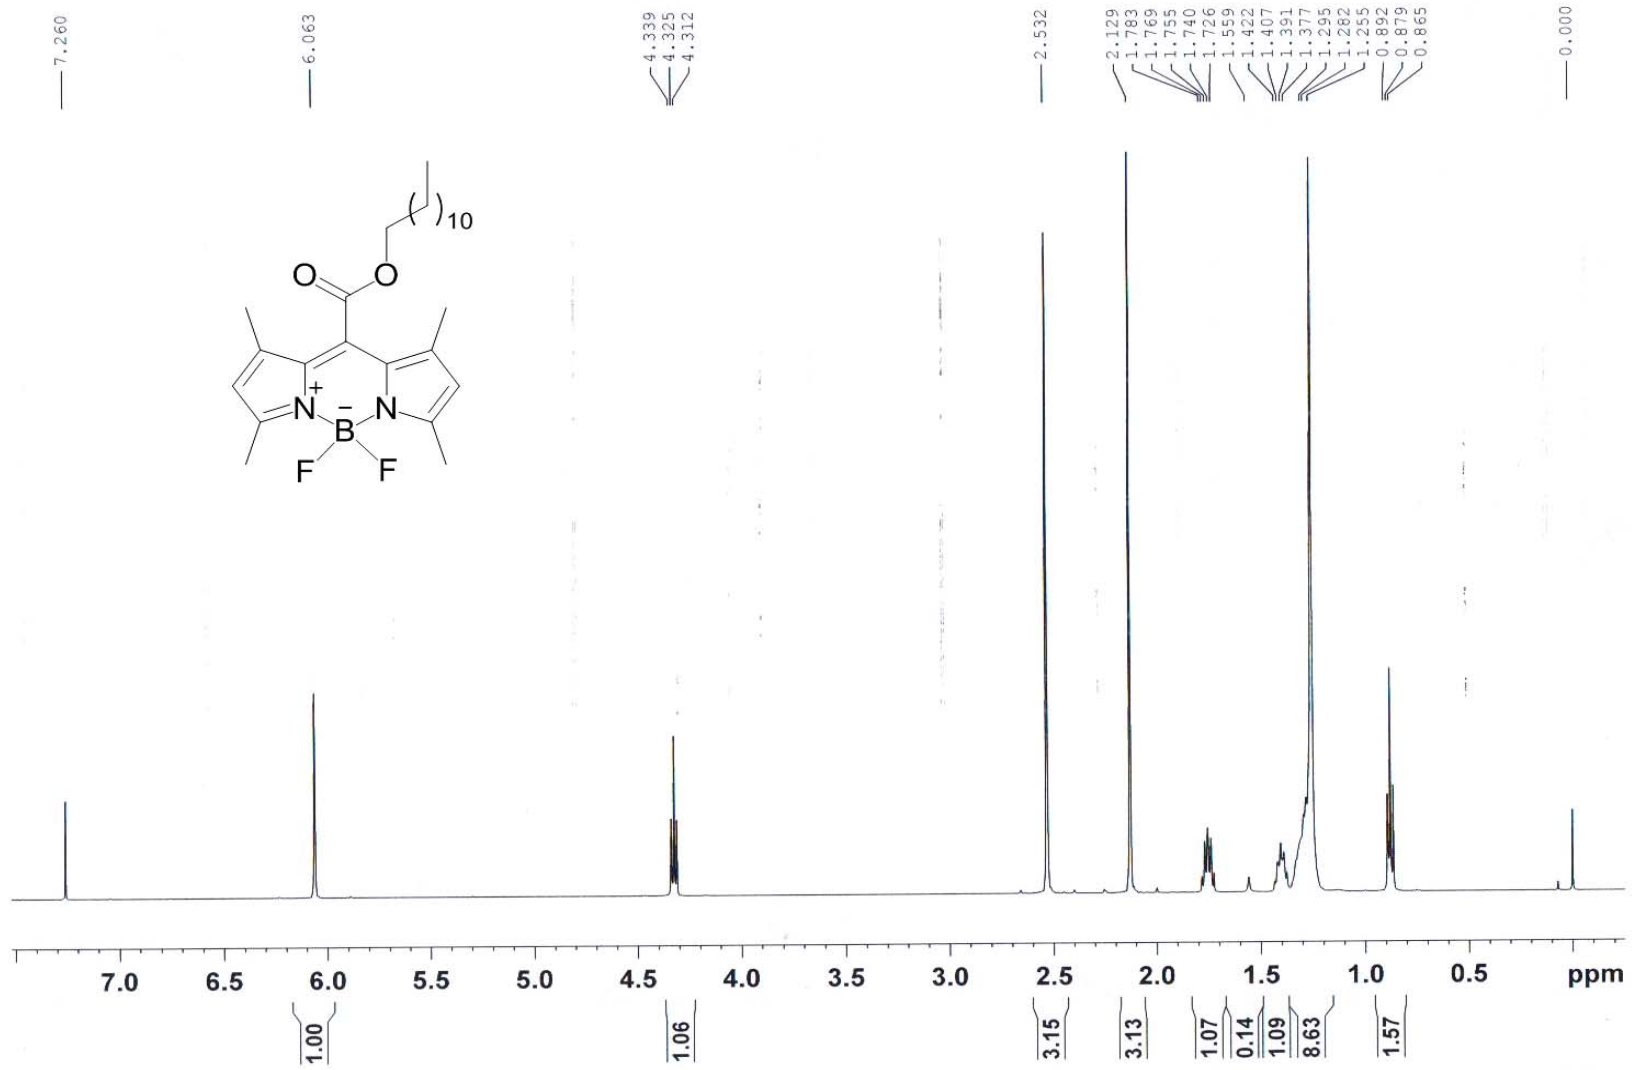

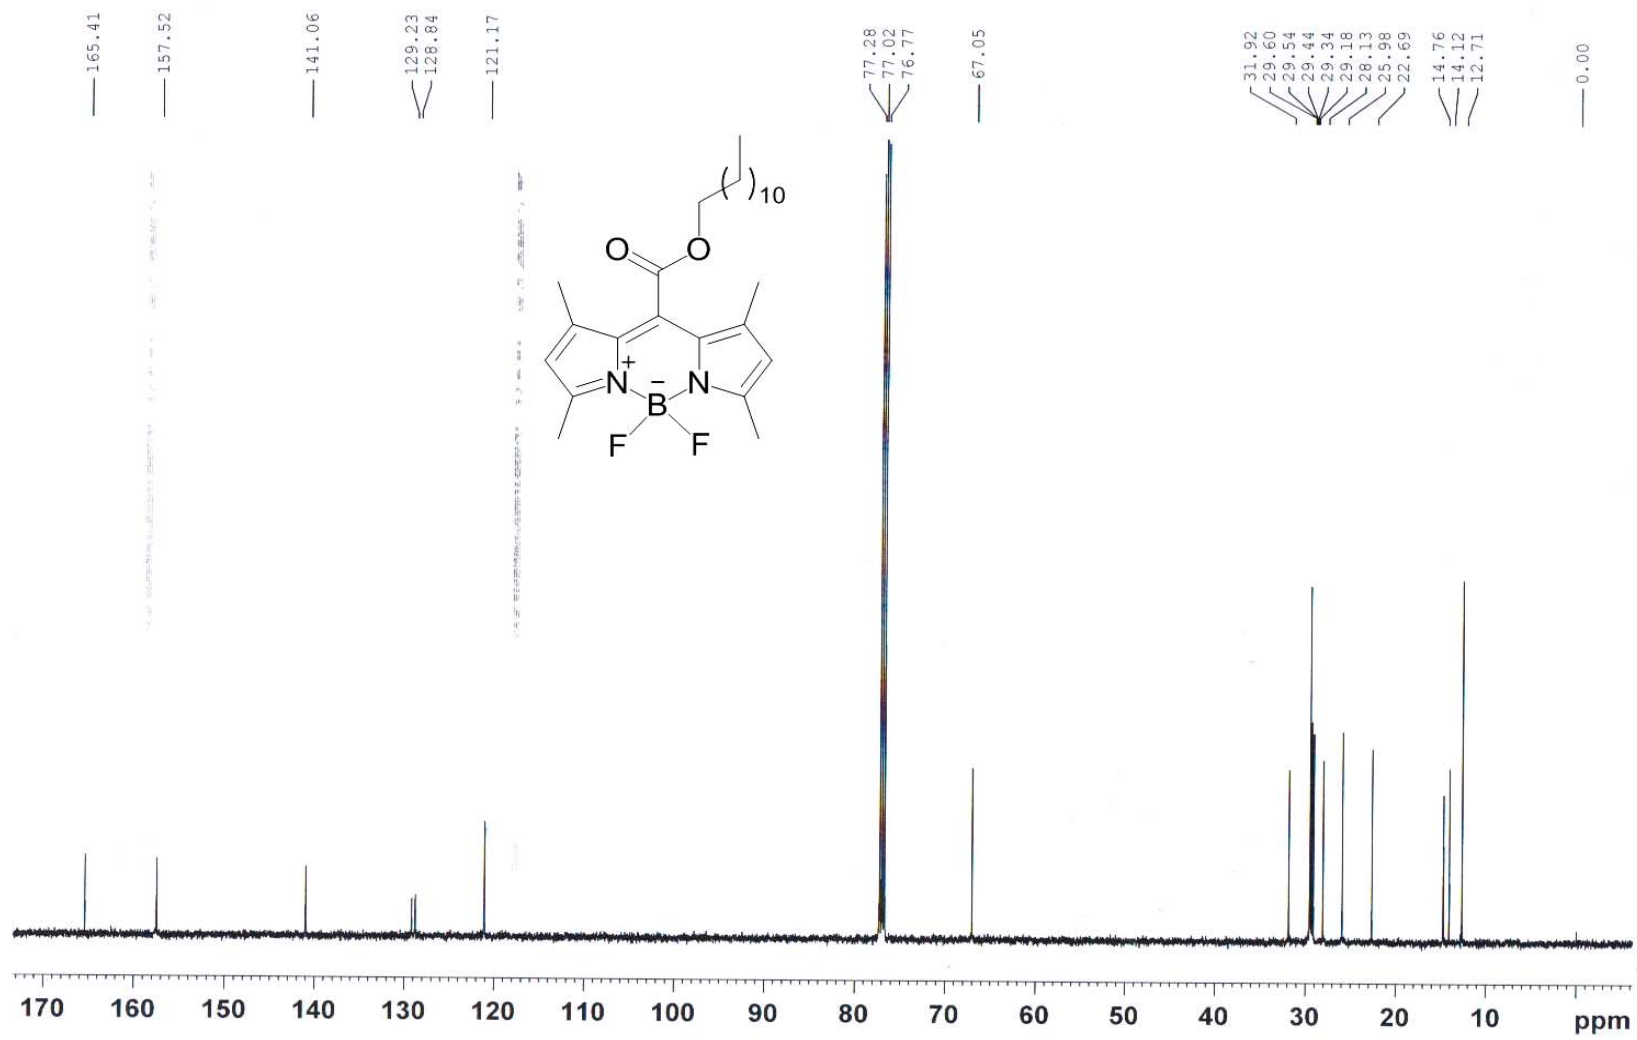

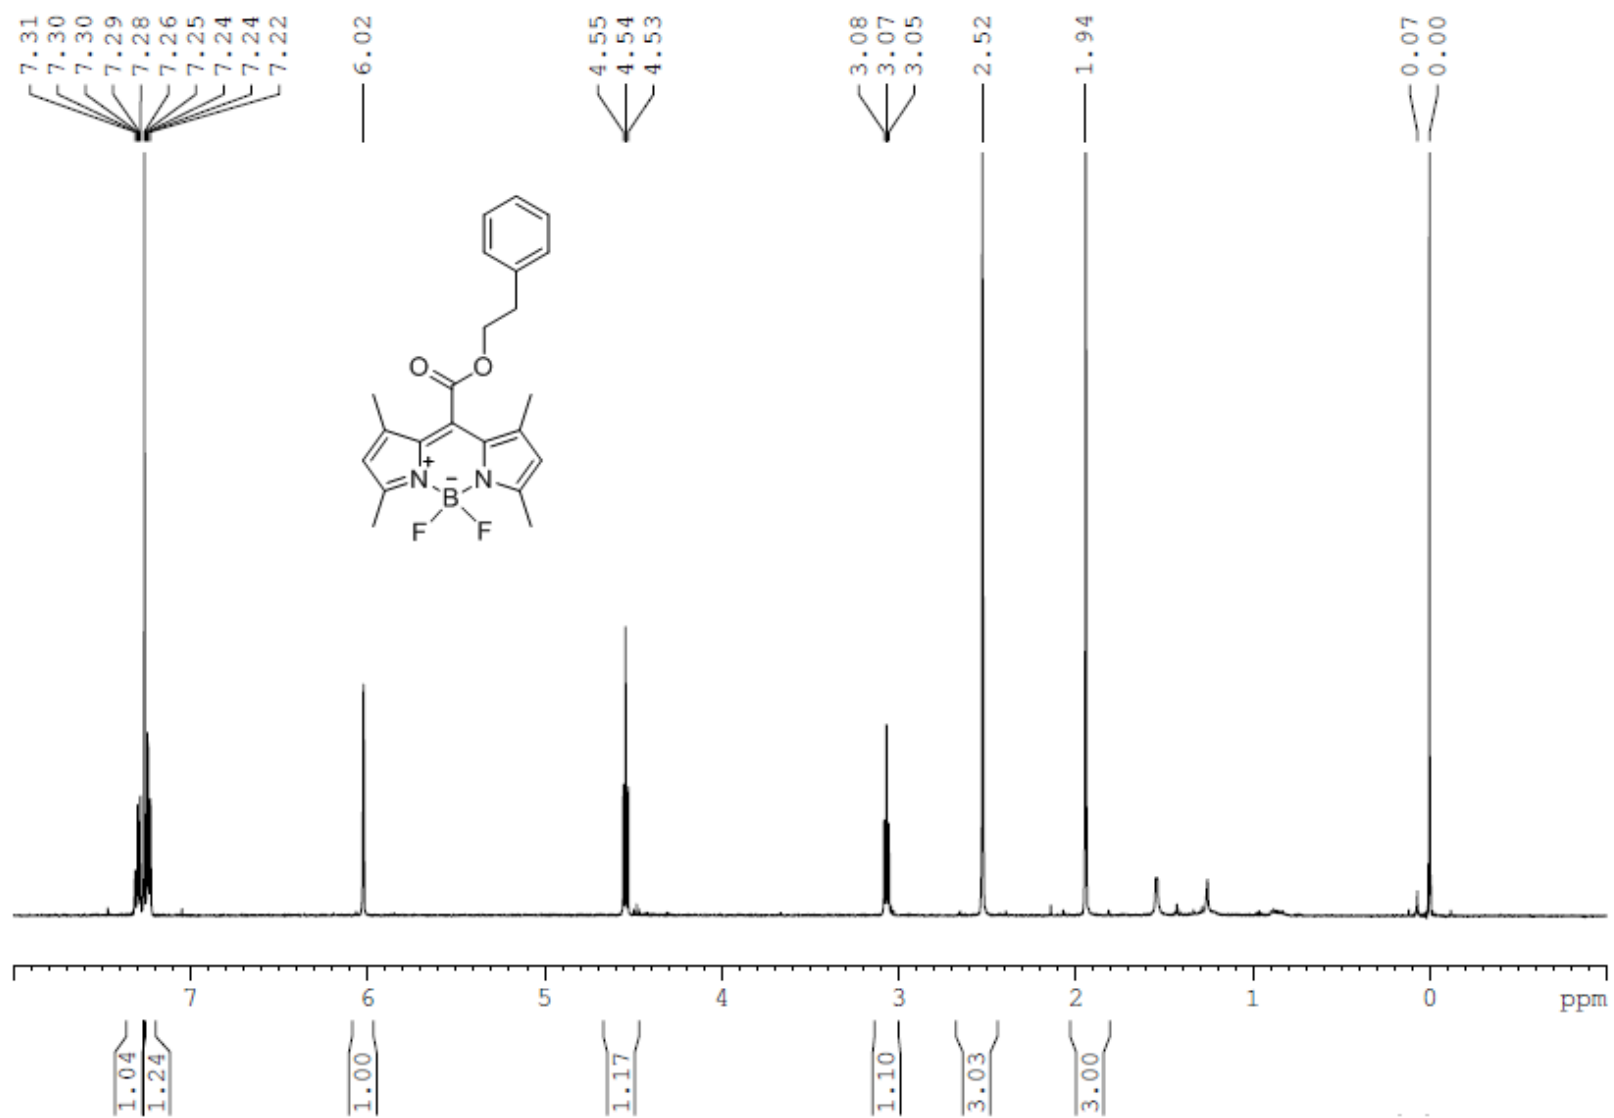

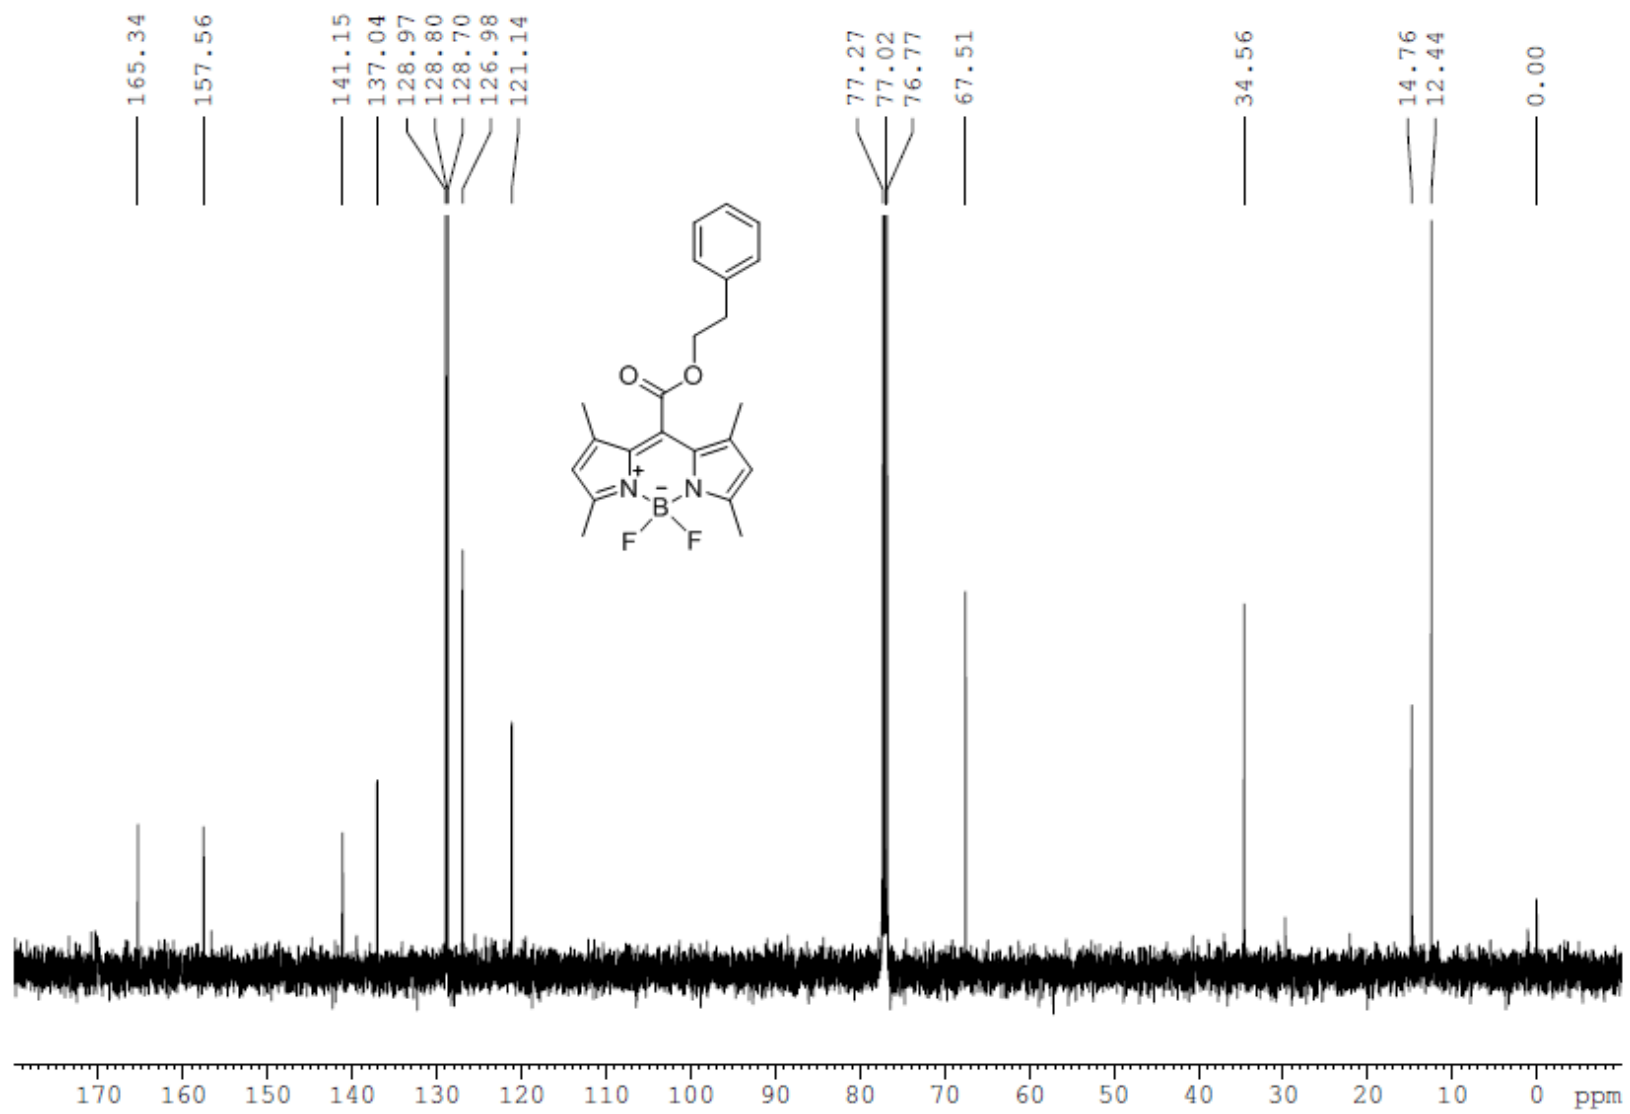

Supplement: c4ra01501k1.pdf [file c4ra01501k1.pdf]
